# Supplementary material
Source: PubMed Central journal article supplement (PMC5505653)
Supplement: NIHMS873997-supplement-1.pdf [file NIHMS873997-supplement-1.pdf]

**Supplemental Table 1: T1D Patient Information.**

| T1D Subject | Age | Duration of disease (days) | C-peptide* |
|-------------|-----|----------------------------|------------|
| K743T1D     | 33  | 387                        | D          |
| K685T1D     | 18  | 713                        | NA         |
| K276T1D     | 10  | 883                        | NA         |
| K787T1D     | 41  | 140                        | D          |
| K807T1D     | 19  | 468                        | NA         |
| K814T1D     | 47  | 541                        | D          |
| K843T1D     | 12  | 383                        | D          |
| K847T1D     | 26  | 161                        | D          |
| K151T1D     | 16  | 1653                       | NA         |
| K180T1D     | 15  | 2482                       | NA         |
| K877T1D     | 27  | 270                        | D          |
| K878T1D     | 12  | 240                        | D          |
| K899T1D     | 25  | 70                         | D          |
| K278T1D     | 59  | 8472                       | ND         |
| K454T1D     | 27  | 5110                       | NA         |

\*random serum C-peptide was obtained within 6 months of the cellular assay.

D: detectable at  $>0.05$  ng/mL; ND: not detectable at limit of detection = 0.05 ng/mL; NA: not measured

**Supplemental Table 2: Frequency of epitopes identified from oligoclones**

| T1D Subject | # of oligo-clones generated                  | Name of Peptide          | # of oligo-clones positive |
|-------------|----------------------------------------------|--------------------------|----------------------------|
| K787T1D     | 4 oligo-clones generated from 41 CD38+ cells | PPI78-90 <sup>K88S</sup> | 4                          |
|             |                                              | GADp15                   | 3                          |
|             |                                              | GADp45                   | 1                          |
|             |                                              | GADp47                   | 1                          |
|             |                                              | GADp48                   | 1                          |
|             |                                              | GADp55                   | 1                          |
|             |                                              | Zn8Tp28                  | 1                          |
|             |                                              | ZnT8p36                  | 1                          |
|             |                                              | Igp39                    | 1                          |
|             |                                              | ChgA: NEI                |                            |
| K276T1D     | 5 oligo-clones from 53 CD38+ cells           | PPI78-90 <sup>K88S</sup> | 5                          |
|             |                                              | GADp23                   | 1                          |
|             |                                              | ZnT8p28                  | 2                          |
|             |                                              | Igp31                    | 1                          |
|             |                                              | ChgA: NEI                |                            |
| K743T1D     | 6 oligo-clones generated from 62 CD38+ cells | PPI78-90 <sup>K88S</sup> | 6                          |
|             |                                              | GADp28                   | 1                          |
|             |                                              | GADp29                   | 1                          |
|             |                                              | GADp32                   | 1                          |
|             |                                              | GADp34                   | 1                          |
|             |                                              | GADp35                   | 1                          |
|             |                                              | ZnT8p28                  | 4                          |
|             |                                              | Igp23                    | 1                          |
| ChgA: NEI   |                                              |                          |                            |
| K877T1D     | 1 oligo-clone from 4 CD38+ cells             | GADp70                   | 1                          |
| K877T1D     | 4 oligo-clones from 40 resting memory cells  | PPI78-90 <sup>K88S</sup> | 3                          |
|             |                                              | GADp10                   | 1                          |
|             |                                              | GADp11                   | 1                          |
|             |                                              | ZnT8p28                  | 1                          |
|             |                                              | IGRP: NEI                |                            |
| ChgA: NEI   |                                              |                          |                            |

NEI: no epitope identified

**Supplemental Table 3: Top 10 TCR Vbeta VDJ sequences of PPI<sub>78-90</sub><sup>K88S</sup> specific T cells isolated from CD45RO+CD38+ oligoclones.**

| Nucleotide                                                               | Amino Acid                   | TCRB V region | TCRB D region    | TCRB J region    | Frequency |
|--------------------------------------------------------------------------|------------------------------|---------------|------------------|------------------|-----------|
| TGTGCCAGCAGCCCCAGG<br>GTACTACGGGAAACACCAT<br>ATATTTT                     | CASSPQGT<br>GNTIYF           | V07-09        | D01-01*01        | J01-03*01        | 26.9%     |
| TGTGCCAGCTCACCTAAAA<br>TGTATGAGCAGTTCTTC                                 | CASSPKMY<br>EQFF             | V18-01*01     | D02-01           | J02-01*01        | 15.4%     |
| TGTGCCAGCAGCTTGGGCC<br>GGGCCGGGGCGGGGAATCA<br>GCCCCAGCATTTT              | CASSLGRA<br>GAGNQPQH<br>F    | V07-08*01     | D02-01*01        | J01-05*01        | 12.2%     |
| TGTGCCAGCAGCTCCCCGA<br>GGTCTCCAGCGGGGGGGCG<br>GTACAATGAGCAGTTCTTC        | CASSPRSP<br>AGGRYNEQ<br>FF   | V09-01        | D02-01*01        | J02-01*01        | 6.5%      |
| TGTGCCAGCAGCGCGGCTG<br>CTAGCGGGGGGCCAGTCAG<br>GGTCACAGATACGCAGTAT<br>TTT | CASSAAAS<br>GGPVRVTD<br>TQYF | V05-04*01     | D02-01*01        | J02-03*01        | 6.5%      |
| TGTGCCAGCAGCTTTTGGGA<br>CGGGGGGGAATCAGCCCCA<br>GCATTTT                   | CASSFWTG<br>GNQPQHF          | V07-09        | D02-01*01        | J01-05*01        | 5.9%      |
| TGTGCCAGCAGCCTAGACA<br>GAATTAATGAAAAACTGTT<br>TTTT                       | CASSLDRIN<br>EKLFF           | V11-02*02     | D01-01*01        | J01-04*01        | 3.2%      |
| <i>TGTGCCAGCAGTTACGGAAT<br/>AGGGAGGGCAGATACGCAGT<br/>ATTTT</i>           | <i>CASSYGIGRA<br/>DTQYF</i>  | <i>V06-06</i> | <i>D02-01*02</i> | <i>J02-03*01</i> | 2.3%      |
| TGTGCCAGCAGCTTCGGGA<br>CGGGGAGAAGGGATGGCTA<br>CACCTTC                    | CASSFGTGR<br>RDGYTF          | V07-09        | unresolved       | J01-02*01        | 1.7%      |
| TGTGCCAGCAGCTTGCAGG<br>GAACGGCTGGAAACACCAT<br>ATATTTT                    | CASSLQGT<br>AGNTIYF          | V07-09        | D01-01*01        | J01-03*01        | 0.4%      |

Italic indicates this sequence is also detected in the memory population of T cells with a frequency of  $3.7/10^6$ .

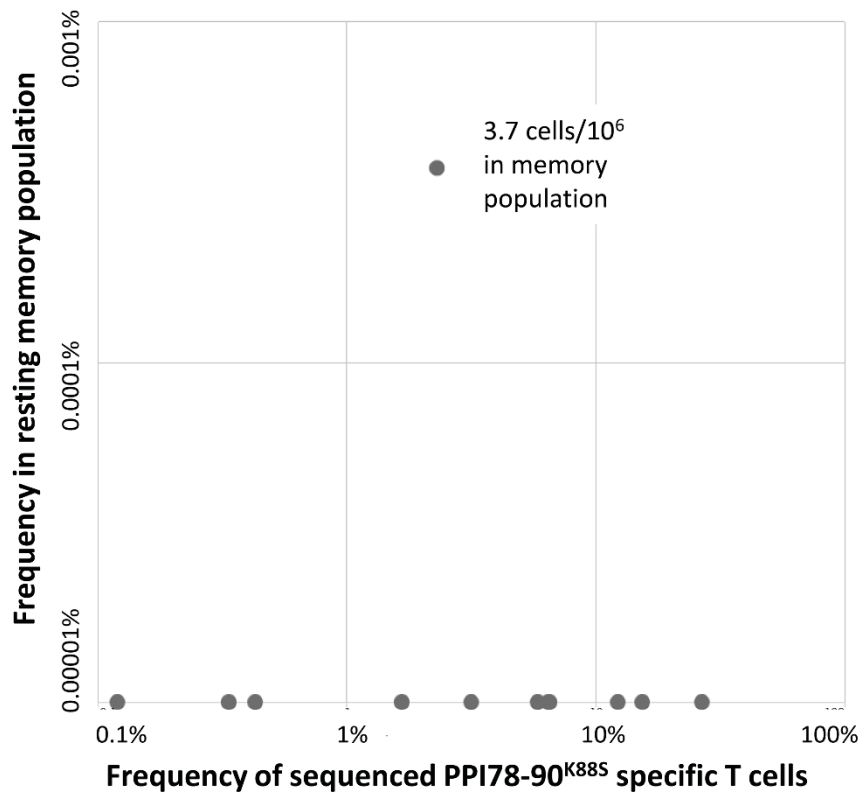

**Supplemental Figure 1. Determining *in vivo* proliferation and persistence of PPI<sub>78-90</sub><sup>K88S</sup> specific T cells.**

PPI<sub>78-90</sub><sup>K88S</sup>-specific T cells identified by CD154 epitope mapping from subject K276T1D were enriched and selected and TCR Vbeta chains sequenced. Plot includes top 10 T cells with unique rearranged CDR3 region according to the frequency of their sequence reads. X-axis: T Cell frequency in resting memory. Y-axis: Frequency from TCR Vbeta sequencing of memory (CD45RO+) T cells obtained 4 months after CD154 epitope mapping assay. One identical rearranged CDR3 region with high counts was identified in the memory fraction of PBMC.
